# Supplementary material for: Regulatory analysis of single cell multiome gene expression and chromatin accessibility data with scREG
Source: PubMed Central journal article supplement (PMC9109353; doi:10.1186/s13059-022-02682-2), 2022-05-16
Supplement: 13059_2022_2682_MOESM1_ESM.pdf [file 13059_2022_2682_MOESM1_ESM.pdf]

# Additional file 1

S1

A

|                         | RNA_PCA | ATAC_LSA | PCA+LSA | scAI    | MOFA+   | intNMF  | scREG   |
|-------------------------|---------|----------|---------|---------|---------|---------|---------|
| CD56 (bright) NK cells  | 0.3987  | 0.6764   | 0.2341  | 0.7878  | 0.6634  | 0.8503  | 0.8868  |
| CD56 (dim) NK cells     | 0.1569  | 0.5368   | 0.0441  | 0.5719  | 0.5249  | 0.7374  | 0.6856  |
| MAIT T cells            | 0.3640  | 0.3738   | 0.4244  | 0.4226  | 0.4191  | 0.5627  | 0.5860  |
| classical monocytes     | 0.3169  | 0.2292   | 0.3394  | 0.4271  | 0.2749  | 0.4282  | 0.3902  |
| effector CD8 T cells    | -0.2735 | -0.1500  | -0.2923 | -0.3481 | -0.2563 | -0.5122 | -0.4786 |
| intermediate monocytes  | 0.2591  | 0.1585   | 0.2183  | 0.1886  | 0.2075  | 0.2172  | 0.3442  |
| memory B cells          | -0.0306 | 0.1653   | 0.0009  | 0.5803  | 0.4192  | 0.5237  | 0.4722  |
| memory CD4 T cells      | -0.0253 | 0.2397   | -0.1283 | 0.1611  | 0.1938  | 0.4093  | 0.2871  |
| myeloid DC              | 0.2107  | 0.3413   | 0.1495  | 0.5342  | 0.5855  | 0.4194  | 0.4405  |
| naive B cells           | 0.5683  | 0.4573   | 0.5404  | 0.8610  | 0.6080  | 0.9109  | 0.9283  |
| naive CD4 T cells       | 0.1766  | 0.4271   | 0.1337  | 0.3520  | 0.4161  | 0.3612  | 0.7410  |
| naive CD8 T cells       | 0.0090  | 0.3799   | -0.0265 | 0.2290  | 0.4395  | 0.4778  | 0.8081  |
| non-classical monocytes | 0.6352  | 0.5221   | 0.6259  | 0.8161  | 0.6831  | 0.8358  | 0.7920  |
| plasmacytoid DC         | 0.7736  | 0.8785   | 0.6739  | 0.9885  | 0.9587  | 0.9328  | 0.9758  |
| <b>Average</b>          | 0.2528  | 0.3740   | 0.2098  | 0.4694  | 0.4384  | 0.5110  | 0.5614  |

B

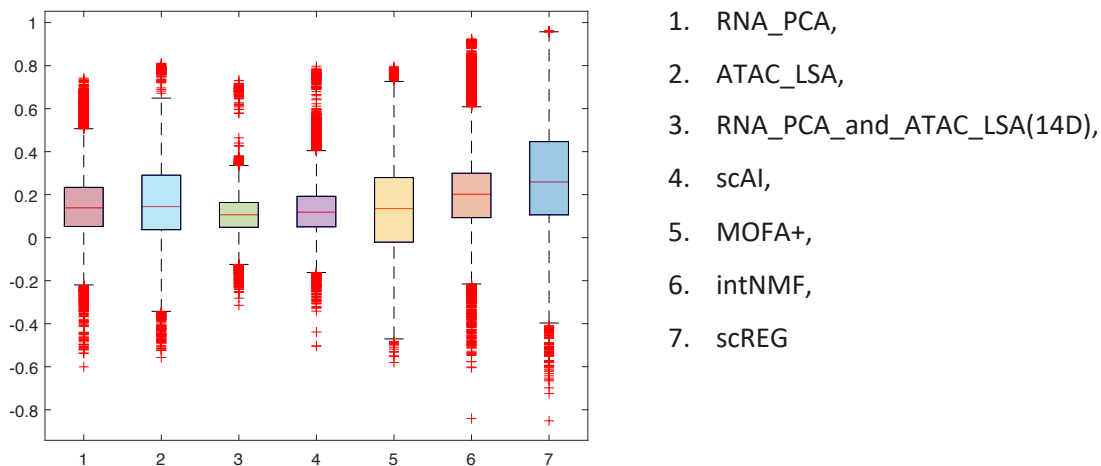

**Fig S1. Comparison of SI resulting from different methods.** (A) Colour scaled table compares the average Silhouette Index of each cell type when implementing different dimension reduction methods. We can see, all methods have poor performance on effector CD8 cell. Except for that, scREG performs better on most of the cell types, SI range from 0.2371 to 0.9758. (B) Box plot shows the distribution of the average SI of all cells by different methods.

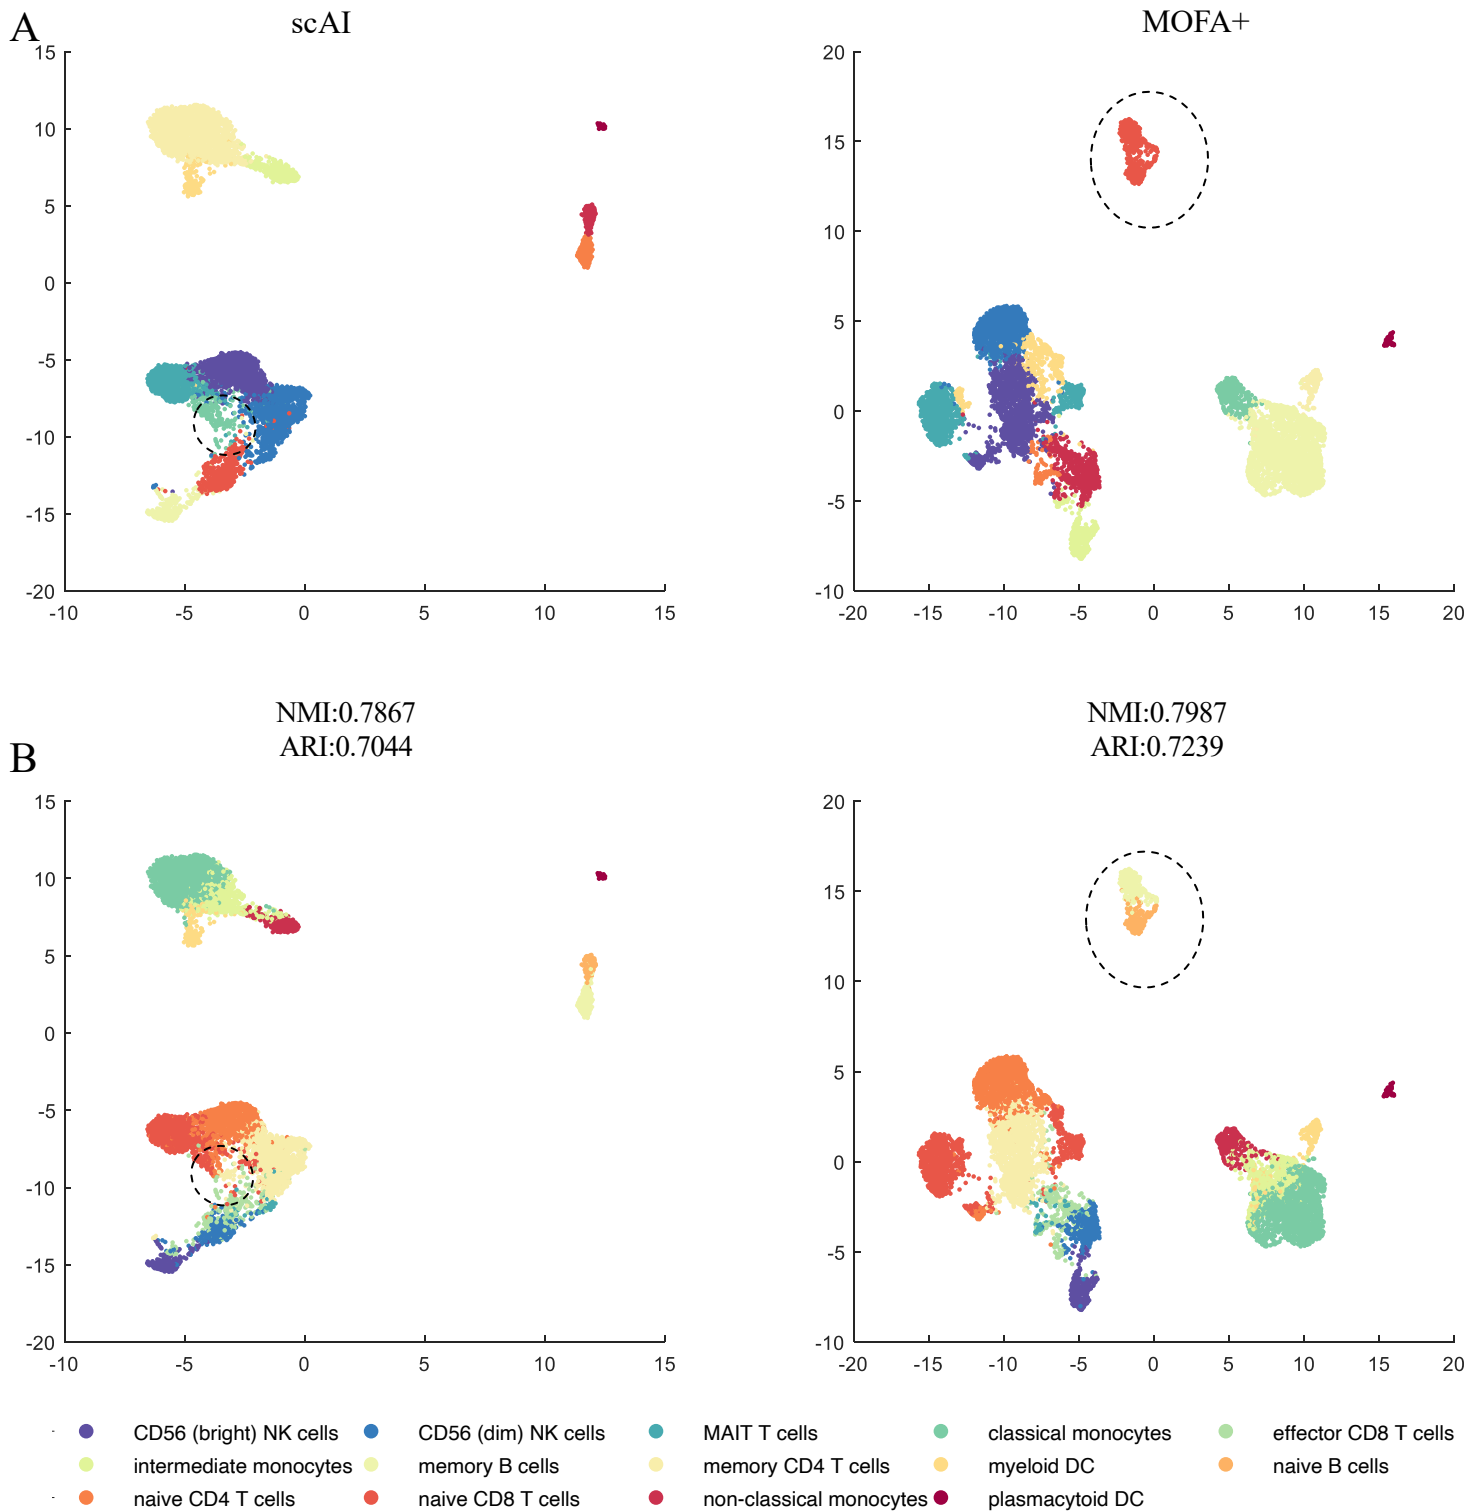

**Fig S2. UMAP visualization of scAI and MOFA+ clustering.** (A) Scatter plot visualize the Umap embedding colored by clustering label from different methods. (B) Same Umap as shown in (A) but colored by the surrogate ground truth. In scAI clustering, we see the cluster in circle is a mixture of three different clusters in true label. In MOFA+ clustering, memory B cells are not separated from naïve B cells; while this separation is clear in scREG. Clustering performance also assessed by calculating Normalized Mutual Information (NMI) and Adjusted Rand Index (ARI) based on the surrogate ground truth.

| Methods        | intNMF |        | MOFA   |        | scAI   |        | Seurat |        | scREG  |        |
|----------------|--------|--------|--------|--------|--------|--------|--------|--------|--------|--------|
|                | nmi    | Ari    | nmi    | Ari    | nmi    | Ari    | nmi    | Ari    | nmi    | Ari    |
| Resolution=0.2 | 0.7023 | 0.4158 | 0.7597 | 0.5466 | 0.7321 | 0.4467 | 0.8350 | 0.7694 | 0.7766 | 0.5886 |
| Resolution=0.4 | 0.7901 | 0.6142 | 0.8039 | 0.7171 | 0.7627 | 0.5811 | 0.8303 | 0.7662 | 0.8337 | 0.7483 |
| Resolution=0.6 | 0.8097 | 0.7141 | 0.7982 | 0.7114 | 0.7615 | 0.5803 | 0.7753 | 0.6351 | 0.8436 | 0.7765 |
| Resolution=0.8 | 0.8035 | 0.7050 | 0.7977 | 0.7168 | 0.7845 | 0.6993 | 0.7607 | 0.6229 | 0.8417 | 0.7754 |
| Resolution=1.0 | 0.7928 | 0.7056 | 0.7987 | 0.7239 | 0.7867 | 0.7044 | 0.7565 | 0.6206 | 0.8467 | 0.7881 |
| Resolution=1.2 | 0.7868 | 0.6925 | 0.7634 | 0.6453 | 0.7879 | 0.7071 | 0.7551 | 0.6178 | 0.8286 | 0.7413 |
| Resolution=1.4 | 0.7878 | 0.6944 | 0.7430 | 0.5377 | 0.7882 | 0.7076 | 0.7395 | 0.5613 | 0.8261 | 0.7384 |
| Resolution=1.6 | 0.7903 | 0.6901 | 0.7477 | 0.5394 | 0.7860 | 0.7299 | 0.7410 | 0.5645 | 0.8186 | 0.7341 |
| Resolution=1.8 | 0.7655 | 0.6435 | 0.7446 | 0.5332 | 0.7875 | 0.7325 | 0.7378 | 0.5658 | 0.8247 | 0.7345 |
| Resolution=2.0 | 0.7638 | 0.6355 | 0.7451 | 0.5360 | 0.7891 | 0.7361 | 0.7360 | 0.5563 | 0.7932 | 0.6761 |

**Fig S3. Performance of different Methods under different resolutions.**

The clustering accuracy of all methods are sensitive to resolution change. The scREG performs very robust under different resolution parameters and achieve the highest performance among all the method we compared.

S4

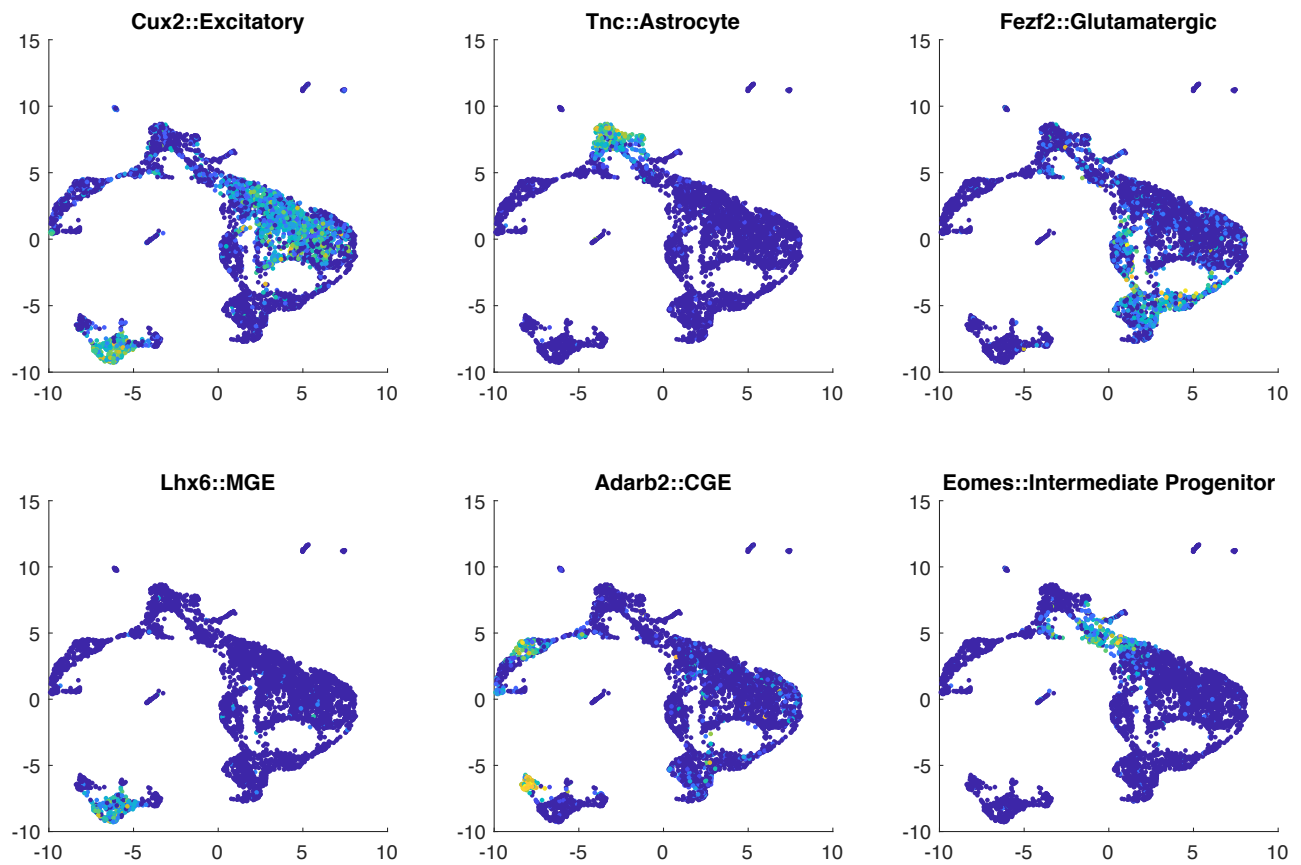

**Fig S4. UMAP visualization of marker genes' expression on mouse E18 brain data.** Each subfigure represents one marker genes' expression. The marker gene's name and corresponding cell type is written in top of each subfigure. Color represents the gene expression level on each cell. Clustering label is shown in Figure 3C.



S5

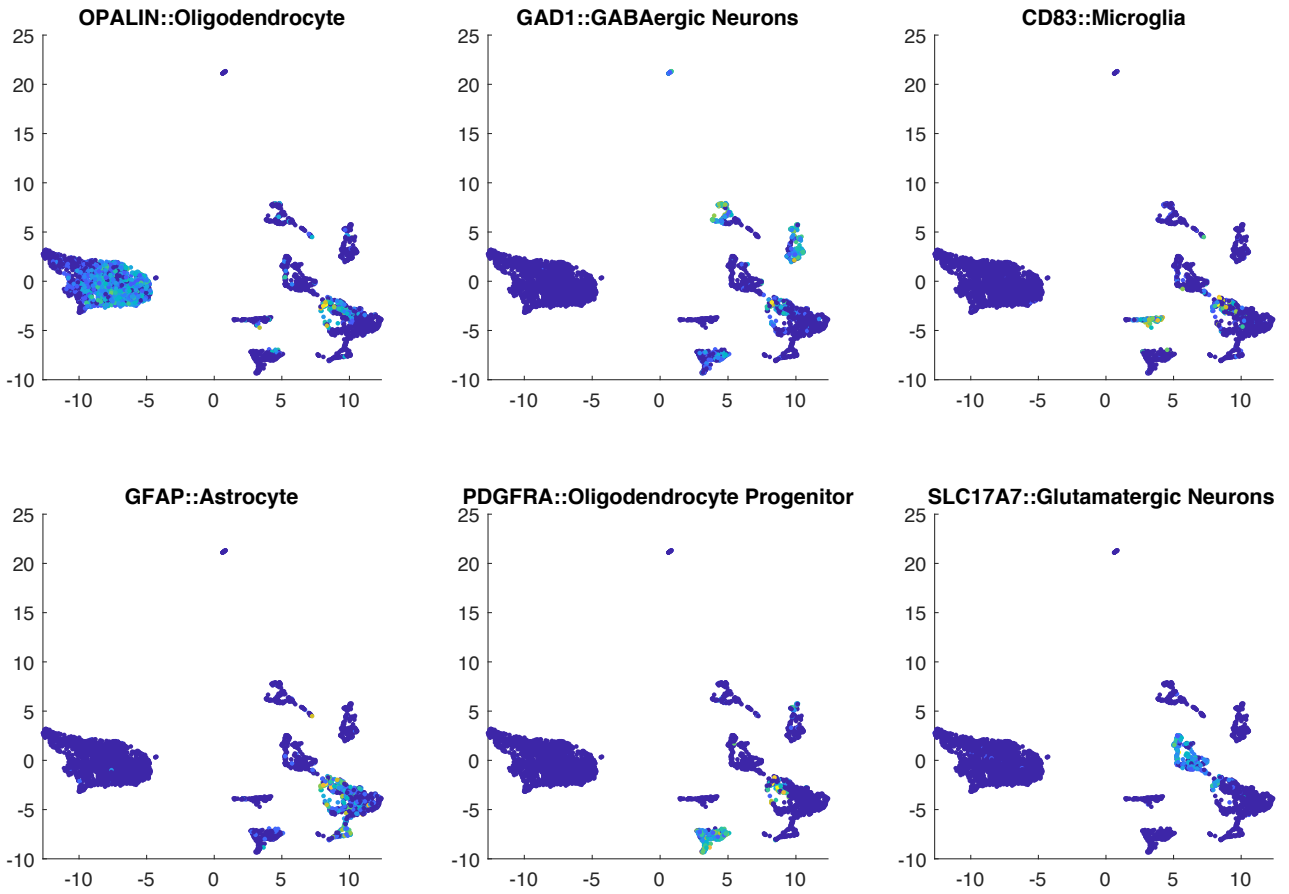

**Figure S5. UMAP visualization of marker genes' expression on human cerebellum data.** Each subfigure represents one marker genes' expression. The marker gene's name and corresponding cell type is written in top of each subfigure. Color represents the gene expression level on each cell. Clustering label is shown in Figure 3D.

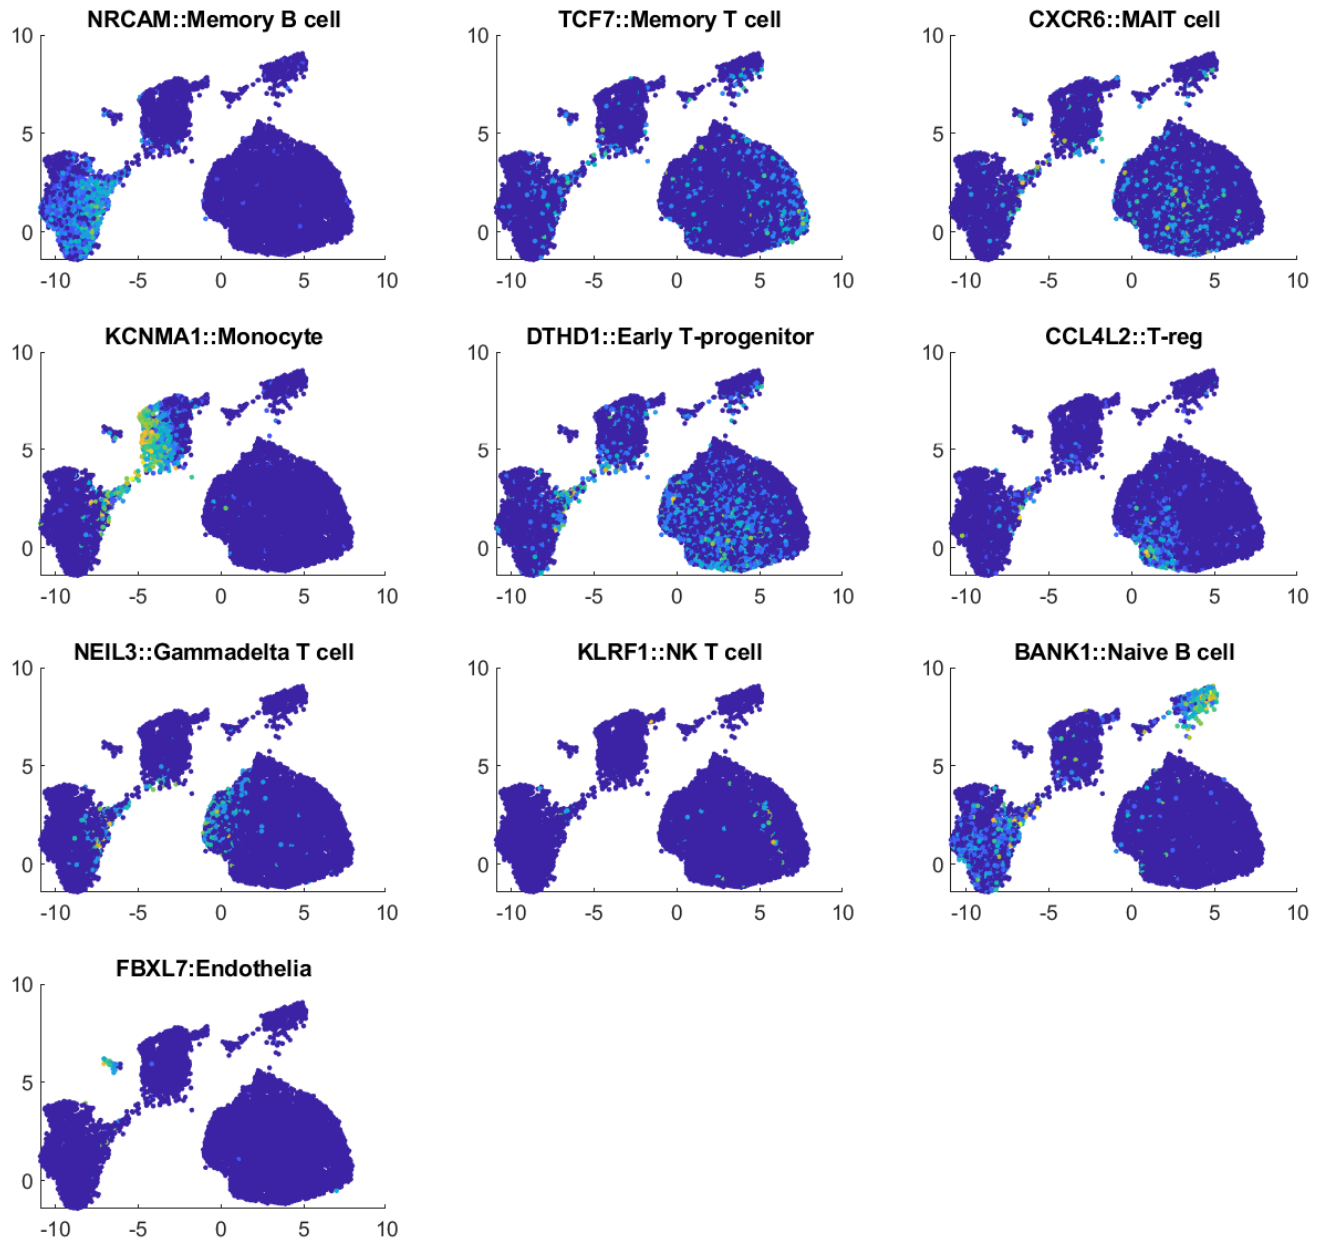

**Figure S6. UMAP visualization of marker genes' expression on lymph node from B cell lymphoma data.** Each subfigure represents one marker genes' expression. The marker gene's name and corresponding cell type is written in top of each subfigure. Color represents the gene expression level on each cell. Clustering label is shown in Figure 3E.

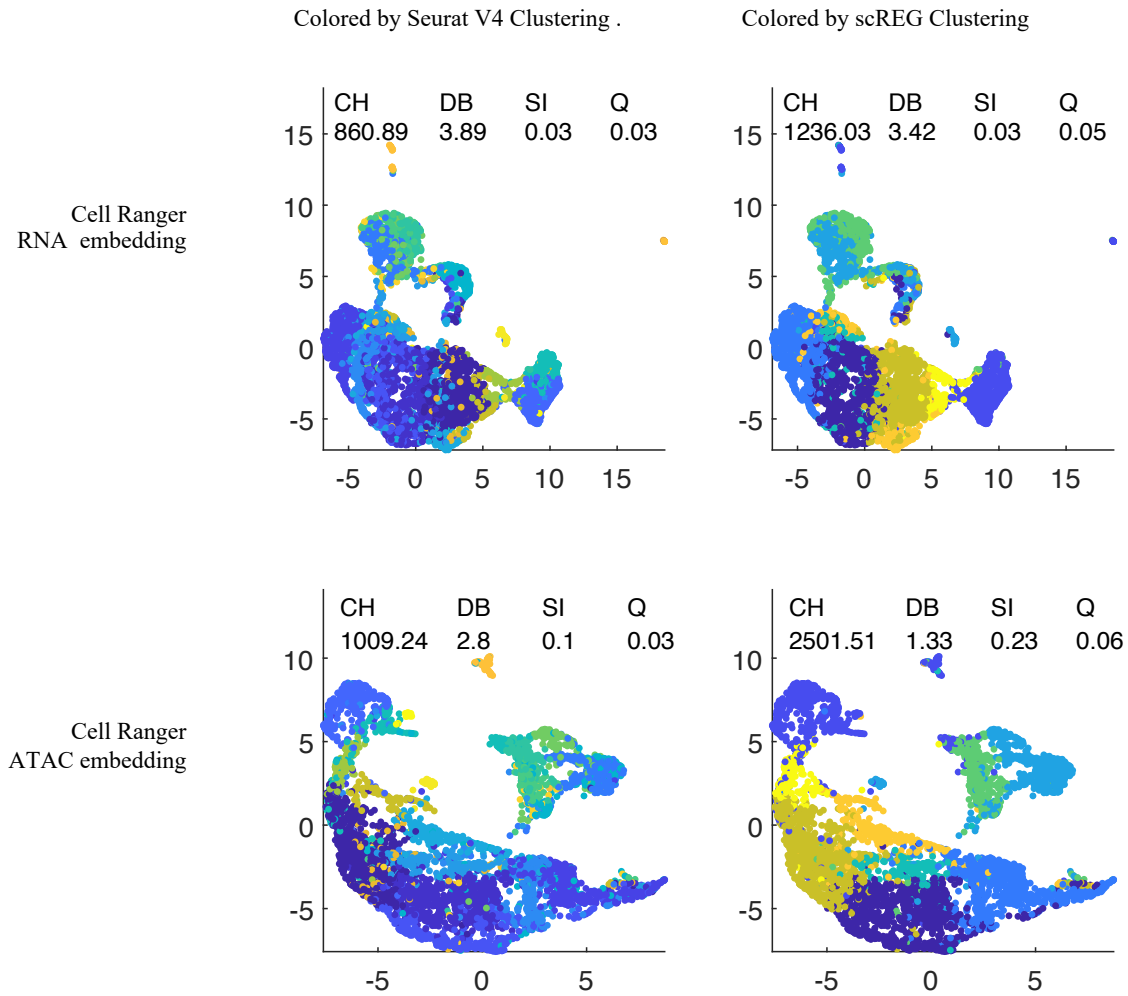

**Figure S7. Evaluation of Seurat V4 clustering and scREG clustering on Cell Ranger scRNA-seq embedding and Cell Ranger scATAC-seq embedding on mouse E18 brain.** Each row presents one common UMAP embedding, and each column represents one clustering method. The color of the dot represent the clustering label. In each subfigures, consistency between different clustering label and 20-dimension PCs embedding are measured by calculating Calinski-Harabasz Index (CH), Davies-Bouldin Index (DB), Silhouette Index (SI), Modularity Q value (Q) respectively. A lower Davies-Bouldin index indicate better clustering, but the other three metrics are the higher the better.

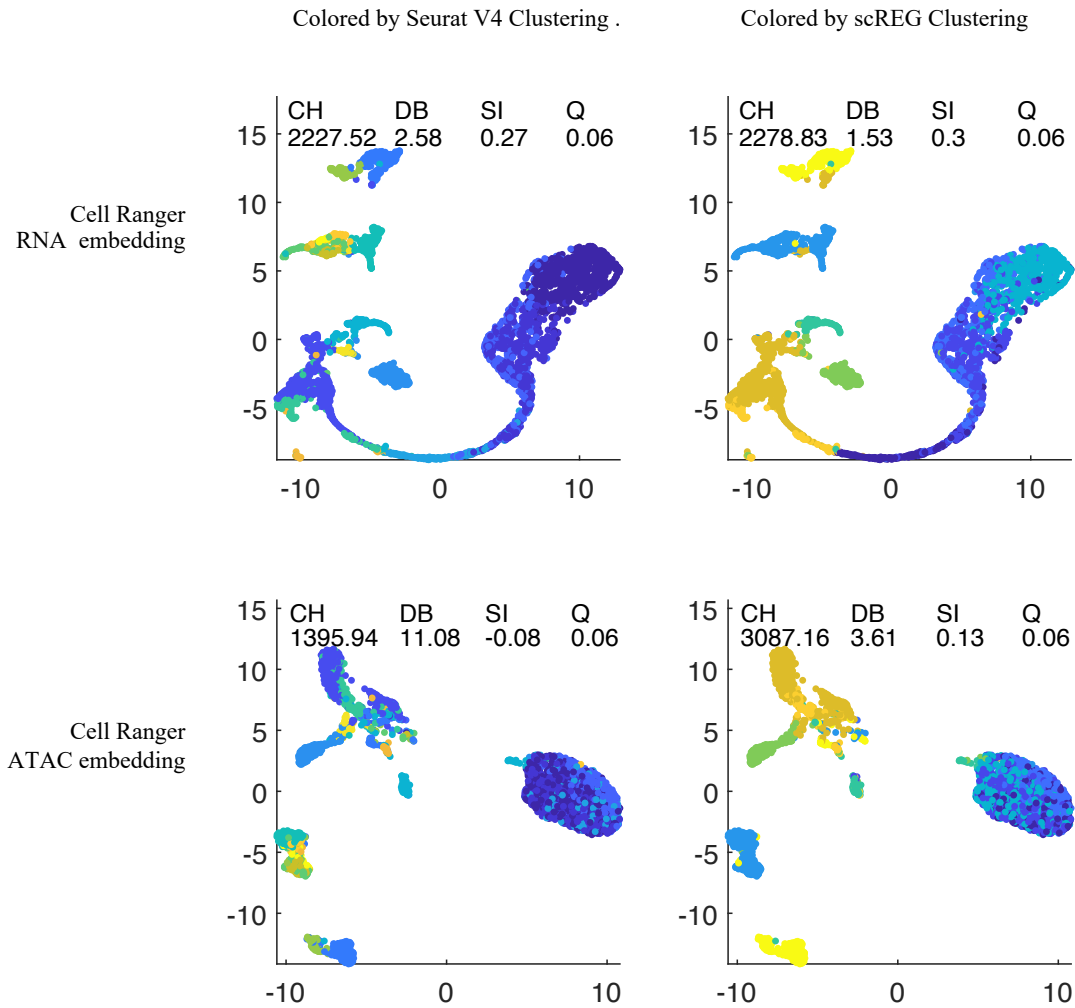

**Figure S8. Evaluation of Seurat V4 clustering and scREG clustering on Cell Ranger scRNA-seq embedding and Cell Ranger scATAC-seq embedding on human cerebellum.** Each row presents one common UMAP embedding, and each column represents one clustering method. The color of the dot represent the clustering label. In each subfigures, consistency between different clustering label and 20-dimension PCs embedding are measured by calculating Calinski-Harabasz Index (CH), Davies-Bouldin Index (DB), Silhouette Index (SI), Modularity Q value (Q) respectively. A lower Davies-Bouldin index indicate better clustering, but the other three metrics are the higher the better.

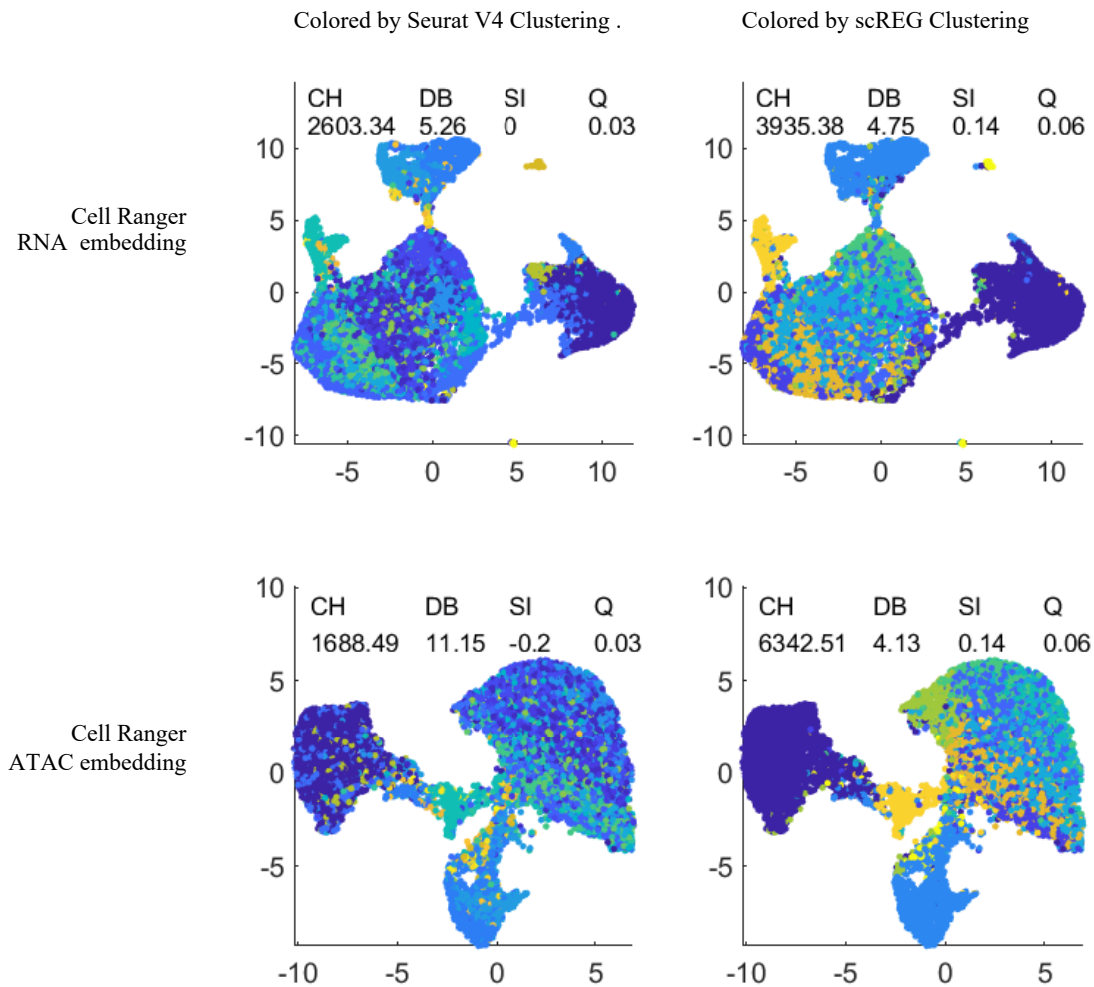

**Figure S9. Evaluation of Seurat V4 clustering and scREG clustering on Cell Ranger scRNA-seq embedding and Cell Ranger scATAC-seq embedding on lymph node from B cell lymphoma.** Each row presents one common UMAP embedding, and each column represents one clustering method. The color of the dot represent the clustering label. In each subfigures, consistency between different clustering label and 20-dimension PCs embedding are measured by calculating Calinski-Harabasz Index (CH), Davies-Bouldin Index (DB), Silhouette Index (SI), Modularity Q value (Q) respectively. A lower Davies-Bouldin index indicate better clustering, but the other three metrics are the higher the better.

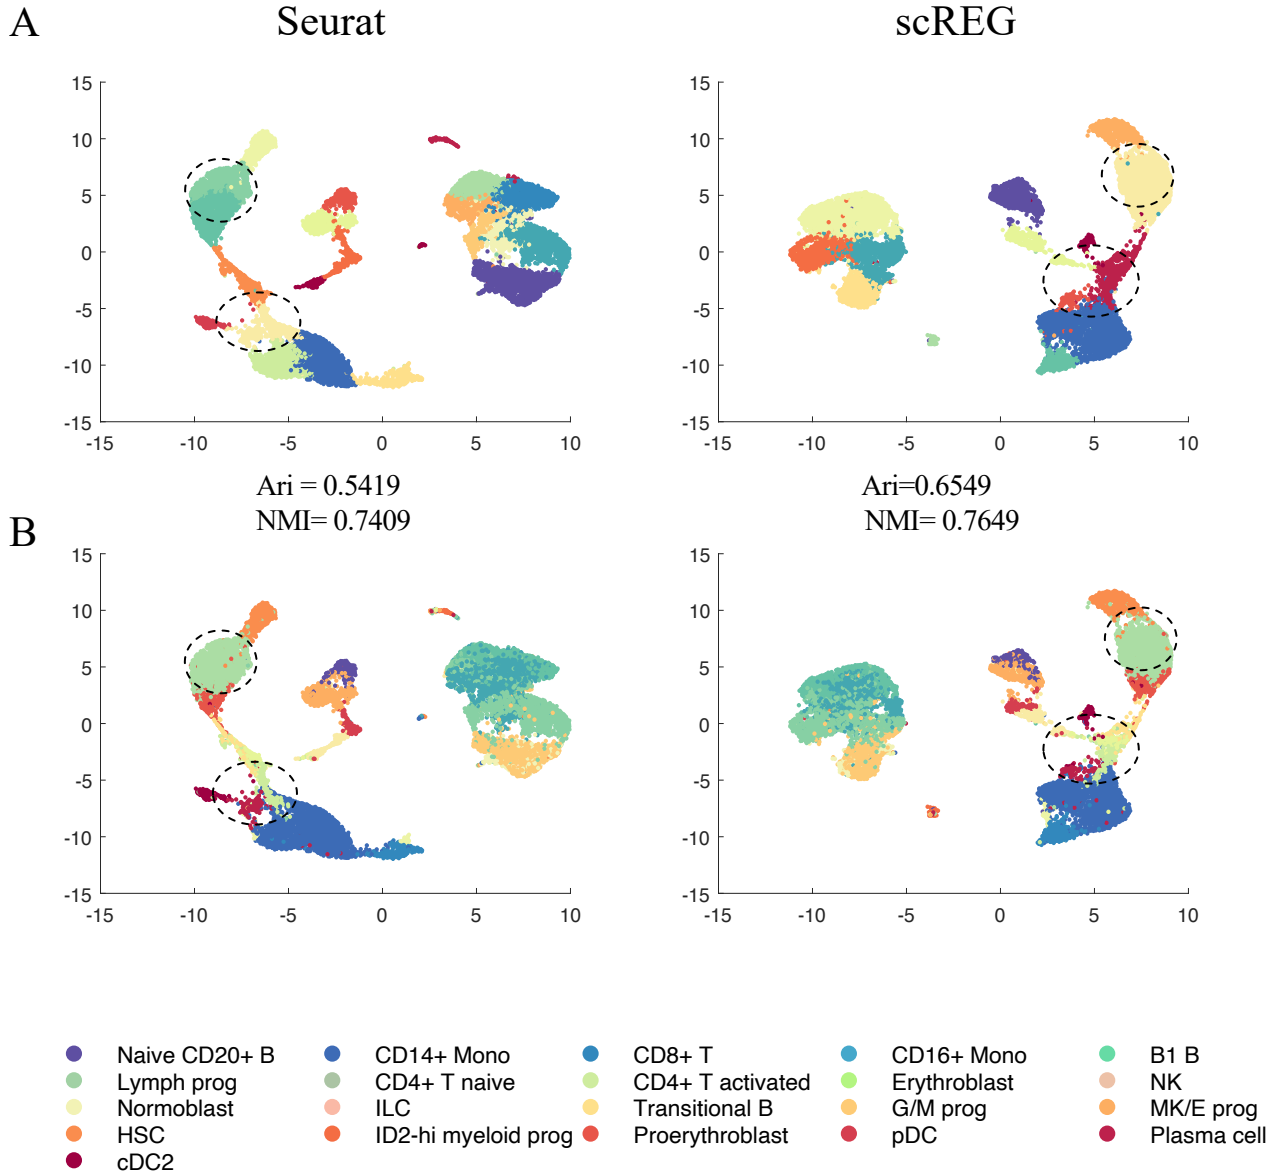

**Figure S10. UMAP visualization of BMMC cell using Seurat and scREG clustering.** (A) Scatter plot visualize the Umap embedding, colored by clustering label from different methods. (B) Same Umap as shown in (A) but colored by the surrogate ground truth. In Seurat clustering, we see the Lymph prog cell is separated into two clusters, while scREG is not separating it (upper circle). In Seurat+ clustering, Erythroblast cells are not separated from and Plasma cells (lower circle); while this separation is clear in scREG. Clustering performance also assessed by calculating Normalized Mutual Information (NMI) and Adjusted Rand Index (ARI) based on the surrogate ground truth.

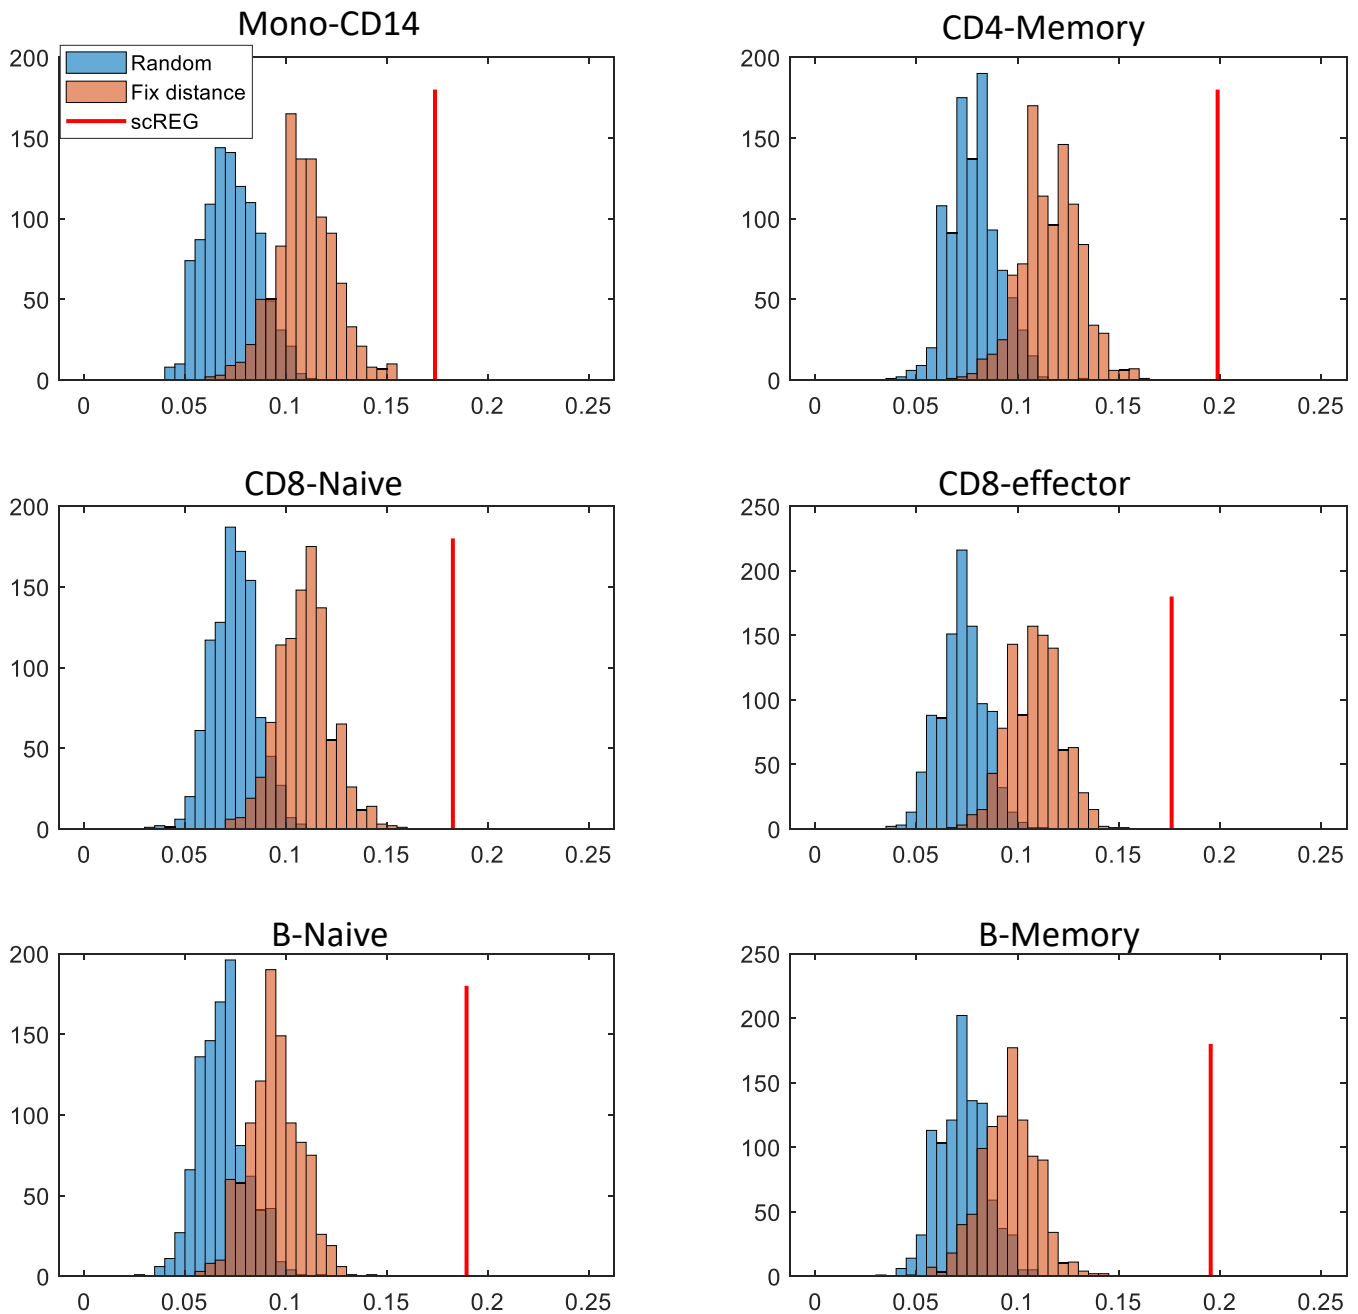

**Figure S11. Validate the RE-TG prediction by HiC data.** Consistency ratio of predicted RE and promoter capture HiC data on different cell types. We can see in all cell type, scREG predict the greatest number of same RE-TG pairs as previously found promoter capture HiC data. set select distribution distance same with scREG, does improve the performance.

| Clusters     | HiC Cell Type | AUROC           |          | AUPR            |          |          |
|--------------|---------------|-----------------|----------|-----------------|----------|----------|
|              |               | scREG           | PCC      | scREG           | PCC      | Random   |
| Mono-CD14    | Mon           | <b>0.637108</b> | 0.544822 | <b>0.164884</b> | 0.129138 | 0.103509 |
| CD4-Naive    | nCD4          | <b>0.629980</b> | 0.535815 | <b>0.178371</b> | 0.117336 | 0.103074 |
| CD4-Memory   | aCD4          | <b>0.631543</b> | 0.535019 | <b>0.153661</b> | 0.119142 | 0.103261 |
| CD8-Naive    | nCD8          | <b>0.644224</b> | 0.563524 | <b>0.166959</b> | 0.137222 | 0.103023 |
| CD8-effector | tCD8          | <b>0.619746</b> | 0.515763 | <b>0.157308</b> | 0.109361 | 0.102681 |
| B-Naive      | nB            | <b>0.634953</b> | 0.496358 | <b>0.151975</b> | 0.097066 | 0.090084 |
| B-Memory     | tB            | <b>0.623901</b> | 0.511744 | <b>0.143048</b> | 0.096570 | 0.094025 |

**Figure S12. AUROC and AUPR predicting HiC data.** Receiver operating characteristic (ROC) curve and Precision-recall (PR) curve taking the HiC data of 7 cell type as ground truth. Validate the prediction of scREG. Curves were plotted by sliding the predicted cis- regulatory score of peak-gene pair. Same as Figure 4(A), PCC was calculated as comparison to scREG prediction. We can see our method achieves much higher AUROC and AUPR than PCC on all cell type.



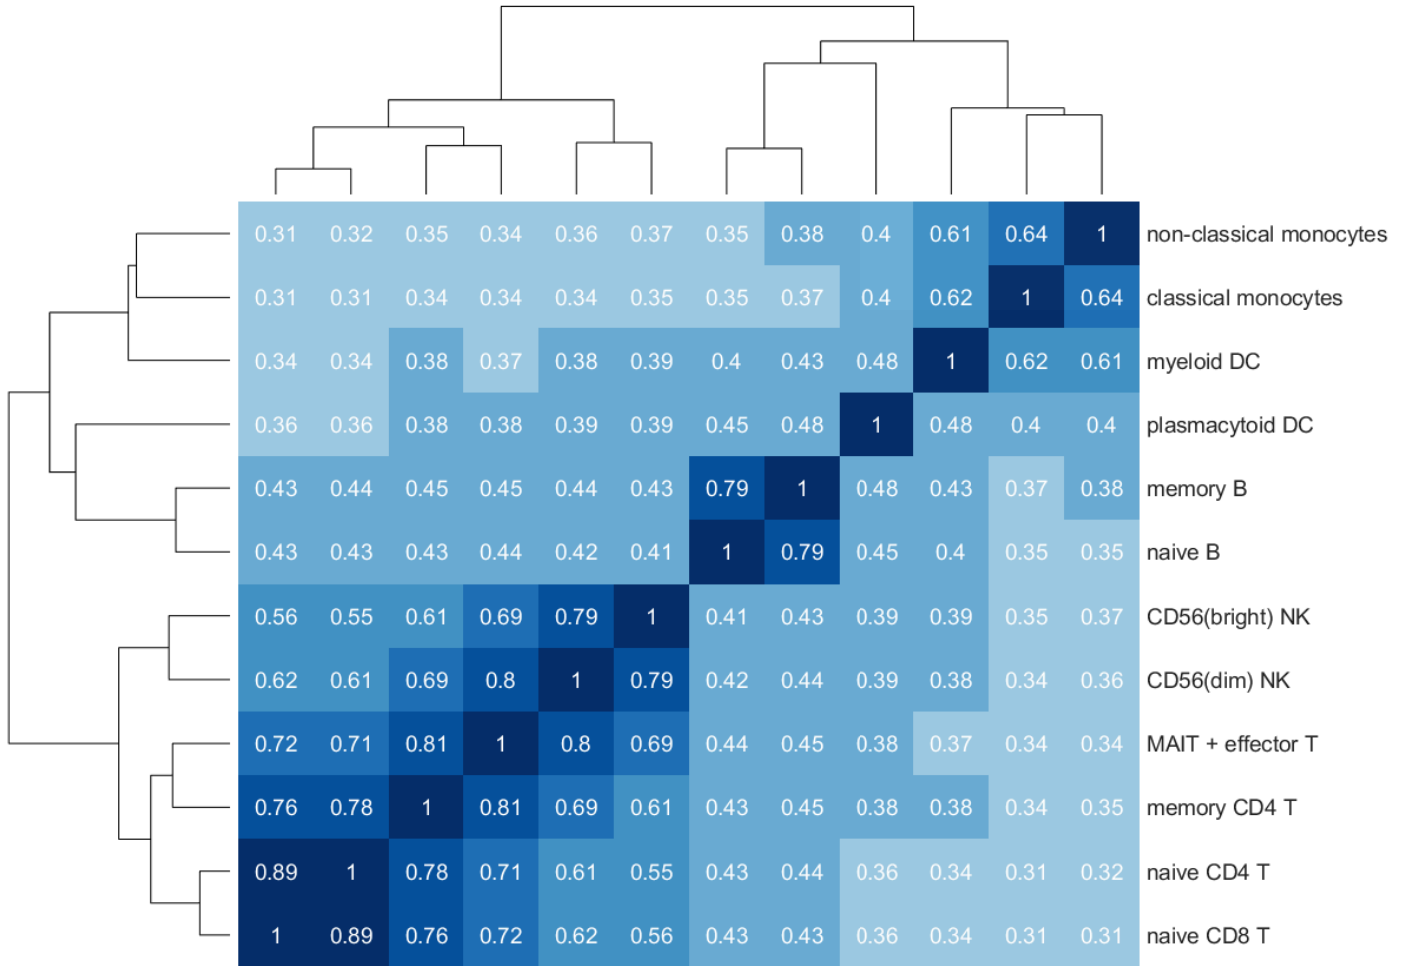

**Figure S13. Clusters specificity of CRS.** We select 10,000 RE-TG pairs with highest CRS score for each cluster and calculate Jaccard similarity between clusters. Some cis-regulation is conserved across cell type and some are cell type specific. The average Jaccard similarity between clusters are 0.4760.
